# Supplementary material
Source: publisher figshare collection journal article supplement (https://tandf.figshare.com/ndownloader/files/13308494)
Supplement: Supplementary file 1 [file 13308494]

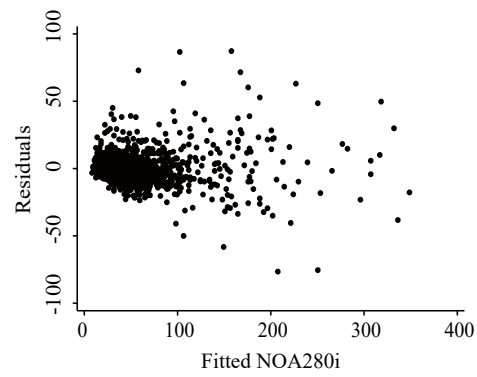

**Supplementary Figure S1.** Residual plot for the linear regression between NOA280i<sup>®</sup> and NIOX VERO<sup>®</sup>. The uniformly distributed residual plot indicated assumption of normality.
